1 **Revisiting tolerance to ocean acidification: insights from a new**  
2 **framework combining physiological and molecular tipping**  
3 **points of Pacific oyster**

4 Mathieu Lutier<sup>1,\*</sup>, Carole Di Poi<sup>1</sup>, Frédéric Gazeau<sup>2</sup>, Alexis Appolis<sup>1</sup>, Jérémy Le Luyer<sup>3</sup>,  
5 Fabrice Pernet<sup>1,\*</sup>

6

7 <sup>1</sup> LEMAR CNRS/UBO/IRD/Ifremer, ZI pointe du diable, CS 10070, F-29280 Plouzané,  
8 France.

9 <sup>2</sup>LOV Sorbonne Université, CNRS, Laboratoire d'Océanographie de Villefranche,  
10 Villefranche-sur-Mer, France.

11 <sup>3</sup>EIO UPF/IRD/ILM/Ifremer, Labex CORAIL, Unité RMPF, Centre Océanologique du  
12 Pacifique, Vairao – BP 49 Vairao, Tahiti, Polynésie française.

13

14

15 Correspondence and requests for materials should be addressed to M.L. (email:  
16 [mathieu.lutier@gmail.com](mailto:mathieu.lutier@gmail.com)) or to F.P. (email: [fpernet@ifremer.fr](mailto:fpernet@ifremer.fr))

17

18 For submission to global change biology.

19

20

21 **Abstract**

22 Studies on the impact of ocean acidification on marine organisms involve exposing  
23 organisms to future acidification scenarios as projected for open ocean, which has limited  
24 relevance for coastal calcifiers. Characterization of reaction norms across a range of pH  
25 and identification of tipping points beyond which detrimental effects are observed has  
26 been limited and focus on only a few macro-physiological traits. Here we filled this  
27 knowledge gap by developing a framework to analyze the broad macro-physiological and  
28 molecular responses over a wide pH range of juvenile Pacific oyster, a model species for  
29 which the tolerance threshold to acidification remains unknown. We identify low tipping  
30 points for physiological traits at pH 7.3-6.9 that coincide with a major reshuffling in  
31 membrane lipids and transcriptome. In contrast, shell parameters exhibit effects with pH  
32 drop well before tipping points, likely impacting animal fitness. These findings were  
33 made possible by the development of an innovative methodology to synthesize and  
34 identify the main patterns of variations in large -omic datasets, fit them to pH and identify  
35 molecular tipping-points. We propose the application of our framework broadly to the  
36 assessment of effects of global change on other organisms.

37

38 **Keywords**

39 Acidification, Lipidomic, Mollusk, Reaction norm, Threshold, Transcriptomic

40

## 41 **Introduction**

42           The exponential increase in the atmospheric emission of carbon dioxide (CO<sub>2</sub>)  
43 from anthropogenic activities is mitigated by ocean absorption that leads to decreasing  
44 surface ocean pH and changes in carbonate chemistry, a phenomenon known as ocean  
45 acidification (OA) (Caldeira & Wickett, 2003; Orr et al., 2005). This represents a  
46 tremendous challenge for marine organisms, especially for calcifiers that produce calcium  
47 carbonate (CaCO<sub>3</sub>)-based exoskeletons. OA not only induces internal acidosis that  
48 impacts metabolism, behavior, growth and reproduction, but also decreases carbonate  
49 ions (CO<sub>3</sub><sup>2-</sup>) concentration in the ocean, the elemental constituent of calcifier  
50 exoskeletons (Gazeau et al., 2013; IPCC, 2019; Kroeker et al., 2013; Tresguerres &  
51 Hamilton, 2017).

52           OA has been the most-studied topic in marine science in recent times (Browman,  
53 2017). As such, many OA experiments have been conducted, usually exposing organisms  
54 to experimental conditions based on scenarios modelled for open ocean waters, typically  
55 simulating present and near-future surface ocean pH levels. However, many calcifying  
56 species thrive in coastal areas where pH levels vary far more than in the open ocean on  
57 both daily and seasonal scales (Vargas et al., 2017; Waldbusser & Salisbury, 2014). Such  
58 variability in coastal environments limits the relevance of applying projections based on  
59 simulations for the open ocean and indicates that knowing the physiological response of  
60 coastal organisms over a wider pH range (Dorey et al., 2013) would be necessary to  
61 accurately assess OA impact.

62           Reaction norm, i.e. the response of an organism to changing environmental  
63 parameters, allows the identification of tipping points that beyond small variations will  
64 have major impacts. According to the last IPCC reports, identification of tipping-points  
65 is a key knowledge gap in environmental change research (IPCC, 2019, 2021). To date,

66 only four studies have experimentally established reaction norms for marine calcifiers in  
67 relation to pH. These studies focused on the assessment of tipping points for a few  
68 selected traits measured at the organism level (i.e. growth, survival) and provide a limited  
69 view of the whole organism response, ignoring the molecular level (Comeau et al., 2013;  
70 Dorey et al., 2013; Lee et al., 2019; Ventura et al., 2016). We therefore identify the need  
71 to integrate macro-physiology and omics together with the reaction norm for  
72 understanding the mechanisms responsible for individual organism success under a  
73 changing environment. This however requires developing an innovative methodology to  
74 synthesize and identify the main patterns of variations in large -omics datasets (Strader et  
75 al., 2020) and fit them to reaction norm.

76 Transcriptomic and lipidomic approaches provide holistic views of organismal  
77 responses to environmental changes at the molecular and biochemical levels. Organisms  
78 do vary in their transcriptomic responses to pH but common patterns have been observed,  
79 including shifts in acid-base ion regulation, metabolic processes, calcification and stress  
80 response mechanisms (Matz, 2018; Strader et al., 2020). Membrane composition in terms  
81 of fatty acid is also modulated as a response to environmental changes and influence  
82 exchanges between intra and extracellular compartments with impacts on metabolic rates  
83 (Hazel & Williams, 1990; Hochachka & Somero, 2002; Hulbert & Else, 1999).

84 Here we determine the reaction norm of juvenile Pacific oyster *Crassostrea gigas*,  
85 one of the most cultivated invertebrate species in the world (FAO, 2020), over a wide  
86 range of pH for macro-physiological traits, membrane lipids and gene expression.  
87 Although the impacts of OA on this model species have been intensively studied using  
88 scenario approaches, there is currently no consensus on its robustness to low pH (Ducker  
89 & Falkenberg, 2020). The establishment of reaction norm with biochemical and

90 molecular data is a novel approach that provide new insights on the sensitivity of marine  
91 calcifiers to OA.

## 92 **Material and methods**

### 93 **Animals and maintenance**

94 The oysters were produced at the Ifremer hatchery facilities in Argenton (Brittany,  
95 France) in late August 2018 according to Petton et al. (2015). The broodstock consisted  
96 of 139 females and 40 males originating from six different cohorts collected in the natural  
97 environment between 2011 and 2016, off Fouras (Ile d'Aix, France). At 40 days old, the  
98 juveniles were moved to the Ifremer growing facilities in Bouin (Vendée, France). On  
99 January 10<sup>th</sup> 2019, oysters were returned to Argenton and kept for 8 d in a 500 L flow-  
100 through tank. Seawater temperature was gradually increased from 7 °C to 22 °C, the  
101 optimal temperature for *C. gigas* (Bayne, 2017), at a rate of *ca.* 2 °C d<sup>-1</sup>. During the  
102 experiment, oysters were continuously supplied with natural seawater originating from a  
103 pool (~9000 m<sup>3</sup>) which is renewed with each spring tide, filtered at 5 µm and UV-treated.  
104 The oysters were fed continuously on a mixed diet of *Isochrysis affinis galbana* (CCAP  
105 927/14) and *Chaetoceros gracilis* (UTEX LB2658) (1:1 in dry weight). Food  
106 concentration was maintained at 1500 µm<sup>3</sup> mL<sup>-1</sup> of phytoplankton cells at the outlet of  
107 the tank – *ad libitum* (Rico-Villa et al., 2009) – and controlled twice daily using an  
108 electronic particle counter (Multisizer 3, Beckman Coulter, USA) equipped with a 100  
109 µm aperture tube. On the eve of the experiment on January 14<sup>th</sup> 2019, oysters were 5-  
110 month-old and divided into 15 batches containing 292 ± 20 individuals (95.2 ± 0.2 g).

### 111 **Experimental design**

112 Each batch of oysters was exposed to one constant nominal pH condition ranging  
113 from pH 7.8 to 6.4 with a step of 0.1 between two levels. The upper pH condition (pH

114 ~7.8) was obtained by running seawater with oysters without pH regulation. The  
115 experimental system consisted of 18 experimental units that were randomly assigned to  
116 one pH condition (n = 15) or to control blanks without animals (n = 3). Each experimental  
117 units consisted of a header tank in which seawater was acidified (except for the ambient  
118 pH and blanks) and then delivered by a pump to a holding tank containing the oysters.  
119 These tanks were 45 L and their entire volume was renewed every 82 min. pH was  
120 regulated by means of pure-CO<sub>2</sub> bubbling, controlled by a pH-regulator (ProFlora® u403  
121 JBL). The pH-regulator was connected to pH-probes installed in each header tank (pH-  
122 sensor+Cal, JBL), checked at the start of the experiment using Certipur® Merck NBS  
123 buffers (pH = 4.00, pH = 7.00). pH electrodes from the pH-regulator were inter-calibrated  
124 twice daily against a pH probe (Sentix® 940-3 WT) connected to a Multiline® Multi 3630  
125 IDS-WTW. The pH-probe was checked once a week using Certipur® Merck NBS buffers  
126 (pH = 4.00, 7.00, and 9.00) and calibrated twice a week on the total scale with a certified  
127 Tris/HCl buffer (salinity 35; provided by A. Dickson, Scripps University, USA).  
128 Throughout the text, pH levels are therefore expressed on the total scale (pH<sub>T</sub>). In each  
129 experimental tank, air bubbling and a small homogenisation pump (3 W) ensured an  
130 efficient mixing of seawater surrounding the oysters. Photoperiod was 10 h light: 14 h  
131 dark. During the entire experimental period, oysters were fed as described above.

132         On January 18<sup>th</sup> 2019, each batch of oyster was randomly assigned to one tank.  
133 Oysters were first held at ambient pH for 3 d. Then, pH was progressively decreased in  
134 each pH-regulated tank at a rate of 0.2 unit d<sup>-1</sup>. The decrease in pH lasted for 7 d for the  
135 lowest condition. Experimental pH conditions were all reached on January 27<sup>th</sup> 2019 and  
136 oysters were maintained at these experimental pH levels for 23 d. No mortality was  
137 recorded during the experiment.

## 138 **Seawater carbonate chemistry**

139 In each oyster tank, temperature, salinity, dissolved oxygen (O<sub>2</sub>) saturation levels  
140 and pH were measured twice a day using a Multiline® Multi 3630 IDS-WTW (pH probe  
141 Sentix® 940-3 WTW, O<sub>2</sub> probe FDO® 925 WTW, salinity probe TetraCon® 925 WTW).  
142 Seawater samples were collected weekly, filtered on 0.7 µm (GF/F, Whatman®) and  
143 poisoned with 0.05% mercury (II) chloride. Total alkalinity (TA) was then measured in  
144 triplicate 50 mL subsamples by potentiometric titration at 22 °C, using a Titrand 888  
145 (Metrohm®) titrator coupled to a glass electrode (ecotrode plus, Metrohm®) and a  
146 thermometer (pt1000, Metrohm®). TA was calculated following the protocol described in  
147 Dickson et al. (2007). pH and TA, together with salinity and temperature, were used to  
148 determine carbonate chemistry parameters using the package seacarb v 3.2.16. of the R  
149 software.

## 150 **Biometry**

151 The total fresh weight (shell + tissue) of each batch of oysters was measured twice  
152 weekly and interpolated between measurements to estimate daily weight. In addition,  
153 shell length and total fresh weight were measured individually on 30 oysters from each  
154 condition at the onset (1 d) and at the end of the experiment (23 d). These oysters were  
155 then dissected and pooled to determine the total weight of shell and tissue, separately.  
156 The tissues were then lyophilized and weighted to obtain dry weight. Growth rate was  
157 calculated as:

$$158 \quad G = (\overline{X}_{23} - \overline{X}_1) \div 23,$$

159 where  $G$  is growth rate as expressed as increase in shell length or total body weight per  
160 day (mm d<sup>-1</sup>, g d<sup>-1</sup>),  $\overline{X}_1$  and  $\overline{X}_{23}$  are the average parameter values for shell length and total  
161 weight measured at the onset (1 d) and the end of the experiment (23 d).

162 Shell thickness was measured on the left valve of five individuals collected per  
163 pH condition at the end of the experiment. The left valve was more susceptible to  
164 acidification than the right valve. We observed holes in the shell under low pH condition  
165 (pH < 6.6) that always occurred on the left valves, close to the umbo. Shells were dried  
166 for 24 h at 45 °C, embedded in polyester resin and cross-sectioned from umbo to opposite  
167 shell margin along the longitudinal growth axis using a precision saw (Secotom-10  
168 Struers). Sections were glued on a microscope slide and polished with silicon carbide  
169 abrasive disks (1200 and 2500 grains cm<sup>-2</sup>). Images of the section were captured under a  
170 Lumar V12 stereoscope (Zeiss) at 30x magnification, and the entire section was  
171 reconstructed using an image acquisition software (AxioVision SE 64 – v4.9.1, Zeiss).  
172 The minimal shell thickness was measured within the first third of the shell starting from  
173 umbo using ImageJ software (Schneider et al., 2012).

#### 174 **Physiological rates**

175 Seawater was sampled twice a day at the inlet and outlet of each oyster tank and  
176 phytoplankton cell concentrations were measured using an electronic particle counter (see  
177 previous section). No pseudofaeces production was detected throughout the experiment.  
178 Ingestion rate was determined as:

$$179 \quad I = \frac{\Delta_{\text{phyto}} \times \text{flow rate}}{W},$$

180 where  $I$  is the ingestion rate expressed as cm<sup>3</sup> min<sup>-1</sup> g<sup>-1</sup>,  $\Delta_{\text{phyto}}$  is difference in  
181 phytoplankton concentrations between the inlet and the outlet of the oyster tanks (cm<sup>3</sup>  
182 min<sup>-1</sup>),  $\text{flow rate}$  is the water flow at the inlet of the oyster tanks (mL min<sup>-1</sup>), and  $W$  is the  
183 total fresh weight of oyster batch (g). The three control blanks were used to check that  
184 there was no sedimentation of algae (no differences in cell concentrations between the  
185 inlet and the outlet, data not shown).



186 Net calcification and respiration rates were measured after 22 d of exposure. Food  
187 supply was stopped 17 h before the assay and tanks were emptied, cleaned and refilled.  
188 Again, 1 h before the assay, the tanks were emptied, cleaned and refilled. At the onset of  
189 the incubation, water flow and air bubbling were stopped. Gentle mixing of the seawater  
190 was maintained by homogenization pump but air bubbling was stopped. Incubations  
191 lasted for 90 min. This duration allowed to keep the pH close to the setpoint (< 0.1 pH  
192 unit variation) despite oyster respiration. At the onset and at the end of the incubation  
193 period, temperature, salinity, pH and O<sub>2</sub> concentration (mg L<sup>-1</sup>) were measured, and  
194 seawater samples were filtered and poisoned for TA analyses (see above) or were  
195 immediately frozen at -20 °C for ammonium (NH<sub>4</sub><sup>+</sup>) measurements (Aminot & K  rouel,  
196 2007) (see Supplementary Table 4). Empty tanks were used as controls to check that there  
197 was no change in any of the parameters due to evaporation or other potential biological  
198 processes in the water itself. Net calcification rate was determined following a modified  
199 procedure from Gazeau et al. (2015) using the alkalinity anomaly technique (Smith &  
200 Key, 1975):

$$201 \quad NC = \frac{(\Delta_{TA} \times \rho - \Delta_{NH_4^+}) \times V}{2 \times t \times W \times \frac{DW}{TW}},$$

202 where *NC* is the net calcification rate expressed as  $\mu\text{mol CaCO}_3 \text{ h}^{-1} \text{ g}^{-1}$ ,  $\Delta_{TA}$  and  $\Delta_{NH_4^+}$  are  
203 differences in TA ( $\mu\text{mol Kg}^{-1}$ ) and NH<sub>4</sub><sup>+</sup> ( $\mu\text{mol L}^{-1}$ ) between the onset and the end of the  
204 incubation period,  $\rho$  is seawater density (kg L<sup>-1</sup>) calculated based on temperature and  
205 salinity during the incubation, *V* is the volume of the tanks (L), *t* is the duration of the  
206 incubations (h),  $\frac{DW}{TW}$  is the ratio of dry weight and total weight determined after  
207 lyophilization of a pool of tissues from 30 oysters (see above).

208 Respiration rate was determined following:

$$209 \quad R = \frac{(\Delta_{O_2} - \Delta_{O_2 \text{ Control}} \times \rho) \times V}{t \times W \times \frac{DW}{TW}},$$

210 where  $R$  is the respiration rate expressed as  $\text{mg O}_2 \text{ h}^{-1} \text{ g}^{-1}$ ,  $\Delta_{\text{O}_2}$  and  $\Delta_{\text{O}_2 \text{ Control}}$  are  
211 differences in  $\text{O}_2$  concentration ( $\text{mg L}^{-1}$ ) between the onset and the end of the incubation  
212 period in the oyster tank and in the three control tanks (average) respectively.

### 213 **Biochemistry**

214 Soft-tissues of five individuals from each pH condition were collected at 23 d,  
215 flash-frozen in liquid nitrogen, pooled, grounded with a ball mill and stored at  $-80^\circ\text{C}$   
216 pending analyses. Oyster powder was diluted with chloroform/methanol (2:1, v/v) for the  
217 determination of neutral lipids (triacylglycerol: TAG, and sterols: ST) using high  
218 performance thin layer chromatography. TAG-ST ratio was used as a proxy of the relative  
219 contribution of lipid reserve to structure (membrane). Polar lipids were purified on silica  
220 gel micro column, transesterified using methanolic  $\text{H}_2\text{SO}_4$  at  $100^\circ\text{C}$ , and the resulting  
221 fatty acid methyl esters (FAME) were analyzed using a gas-chromatography flame  
222 ionization detection system equipped with a DB-Wax capillary column. Peaks were  
223 analyzed by comparison with external standards. Each fatty acid was expressed as the  
224 peak area percentage of total polar fatty acids. Carbohydrate content ( $\mu\text{g mg}^{-1}$ ) was  
225 determined according to the colorimetric method described in DuBois et al. (1956).

### 226 **Transcriptomics**

227 Soft-tissues of five individuals from each tank were collected at 23 d, flash-frozen  
228 in liquid nitrogen and individually grounded ( $n = 75$ ). Total RNA was then extracted with  
229 Extract-All (Eurobio) at a ratio of 5 mL per 100 mg of tissue. RNA quantity/integrity and  
230 purity were verified with a NanoDrop 2000 spectrophotometer (Thermoscientific®) and  
231 a Bioanalyzer 2100 (Agilent Technologies®) respectively. Samples were then DNase-  
232 treated using a DNase Max™ Kit (MO BIO Laboratories, Inc.) and analyzed at the  
233 Genotoul sequencing platform (INRAE US 1426 GeT-PlaGe, Centre INRAE de Toulouse

234 Occitanie, Castanet-Tolosan, France). TruSeq RNA libraries were multiplexed and  
235 sequenced on a single lane of NovaSeq6000 Illumina S4 150-bp paired-end.  
236 Raw reads were first filtered using Trimmomatic v.0.36 for a minimum length (60 bp), a  
237 minimum quality (trailing = 20, leading = 20) and the presence of potential contaminants  
238 and remaining adaptors (<https://ftp.ncbi.nlm.nih.gov/pub/UniVec>; 08/17/20). The quality  
239 of the reads was monitored before and after this trimming process with FastQC v.0.11.5  
240 (<https://www.bioinformatics.babraham.ac.uk/projects/fastqc/>). The *C. gigas* reference  
241 genome (Peñaloza et al., 2021) was downloaded from NCBI (GCF\_902806645.1) and  
242 indexed with Gmap v2020.06.01. Filtered reads were mapped against the reference  
243 genome using GSNAP v2020-06-30 keeping default parameters but allowing a minimum  
244 mismatch value of 2 and a minimum read coverage of 90%. Finally, the gene expression  
245 levels were assessed using HTSEQ v0.6.1. The DESeq2 v1.30.0 R package was used to  
246 process the expression with a first step of normalization using the variance-stabilizing  
247 transformation implemented in the ‘*vst*’ function. The *vst* matrix was used to build a  
248 signed weighted co-expression network analysis implemented in the WGCNA v1.69 R  
249 package. First, genes with low overall variance (< 5%) were removed for the analysis as  
250 recommended (Langfelder & Horvath, 2008). We fixed the “soft” threshold powers of 13  
251 the scale-free topology criterion to reach a model fit (IRI) of 0.90. Clusters were defined  
252 using the “*cutreeDynamic*” function (minimum of 50 genes by cluster and default cutting  
253 height of 0.99) based on the topological overlap matrix, and an automatic merging step  
254 with the threshold fixed at 0.25 (default) allowed merging correlated clusters. For each  
255 cluster, we defined the cluster membership (kME; Eigengene-based connectivity) and  
256 only clusters showing significant correlation ( $p < 0.01$ ) to pH were kept for downstream  
257 functional analysis.

## 354 **Statistical analysis**

355 All statistical analyses were performed using the R software v4.0.3 and the  
356 threshold of statistical significance was fixed at 0.05 unless specifically stated.  
357 Relationships between dependent variables and average pH recorded during the exposure  
358 period (or the incubation period for net calcification and respiration rates) were computed  
359 using regression models. Dependent variables were biometrics (shell length, total body  
360 weight, and growth), physiological rates (ingestion, net calcification and respiration),  
361 biochemistry (lipid reserves, carbohydrates) and gene expression. Each gene included in  
362 the WGCNA clusters were individually tested against pH. Fatty acids were summarized  
363 using principal component analysis and separated into two groups according to their  
364 correlation with first principal component (positive or negative). Each group was then  
365 summed and tested against pH. Piecewise, linear and log-linear regression models were  
366 tested and compared for each individual variable (or set of variables). In each case, the  
367 model that had the highest  $R^2$ , the lowest Akaike and Bayesian information criteria (AIC,  
368 BIC) and the lowest residual sum of squares was selected. For each piecewise regression  
369 model, we estimated the tipping point, defined as the values of the pH where the  
370 dependent variables tip, by implementing the bootstrap restarting algorithm (Wood,  
371 2001). For physiological rates, we also determined the critical-point defined as the pH at  
372 which the dependent variable was equal to zero. Normality of residual distribution was  
373 tested using Shapiro-Wilk test and homogeneity of variances was graphically checked.  
374 Significance of each slope was tested according to Student's  $t$  test. Piecewise regression  
375 models were built using the segmented v1.3-4 R package.  
376 For transcriptomic analysis, only genes that are significantly correlated to pH were tested  
377 among the retained clusters (Pearson correlation). The frequency distribution of pH  
378 tipping-point values was plotted for each cluster of genes. Groups of genes which exhibit

379 neighboring tipping points with distribution frequencies > 5%, were grouped together and  
380 used for GO enrichment analysis using GOA-tools v0.7.11 (Klopfenstein et al., 2018),  
381 implemented in the Github repository ‘*go\_enrichment*’ ([https://github.com/enormandeu/  
382 go\\_enrichment](https://github.com/enormandeu/go_enrichment)) and the go-basic.obo database (release 2019-03-19) with Fisher’s exact  
383 tests. Only significant GO terms that included a minimum of three genes and with  
384 Bonferroni adjusted  $P < 0.01$  were kept. For complementarity with previous studies, we  
385 also specifically examined the genes that are commonly reported as involved in the  
386 calcification process and in the formation of the organic matrix of the shell and  
387 periostracum.

## 388 **Results**

### 389 **Acclimation of oysters to 15 different pH conditions**

390 During the experiment, pH levels in the oyster tanks were stable and reached the  
391 targeted values, except for the lowest pH condition that was  $6.5 \pm 0.3$  instead of 6.4  
392 (Supplementary Note 1, Supplementary Table 1, Supplementary Figure 1). The effects of  
393 acidification were clearly visible at the end of the experiment on the color and the size of  
394 the shells, as shown in Figure 1. Shell pigmentation apparently decreased with decreasing  
395 pH. Total body weight and shell length of oysters ranged from  $0.4 \pm 0.1$  to  $2.0 \pm 0.8$  g  
396 and from  $12.9 \pm 2.1$  to  $25.4 \pm 4.5$  mm respectively (mean  $\pm$  SD; Figure 2A, Supplementary  
397 Figure 2).

### 398 **Most macro-physiological traits tip at low pH values between 7.1-6.9**

399 We measured biometric parameters like the length, thickness, and weight of the  
400 shell and the total body weight and the dry flesh weight at the end of the 23-day exposure  
401 to the 15 different pH conditions. We calculated growth rates for shell length and total  
402 body weight, and we measured physiological rates like calcification, ingestion and  
403 respiration rates. From these data, we identified an overall tipping point for macro-

404 physiological traits at pH ~7.1-6.9 below which they declined sharply (Figures 2A-H).  
405 Calcification rate and growth rates exhibited critical points at pH 6.8 and 6.6, respectively,  
406 below which they became negative and turned to net dissolution of the shell and weight  
407 losses (Figures 2B-D). Concomitantly, respiration rate was arrested at pH 6.7 and  
408 ingestion rate was near-zero at pH 6.5 (Figure 2E-F).

#### 409 **Shell parameters and respiration rate are impacted above tipping point**

410 Although macro-physiological traits were generally unaffected by reductions in  
411 pH above tipping points, this was not the case for shell length, shell weight and respiration  
412 rate. Both shell parameters indeed decreased with decreasing pH while the respiration  
413 rate increased before reaching the tipping point (Figures 2A, 2E and 2G). In addition, the  
414 shell thickness was the only parameter that decreased linearly over the entire pH range  
415 without tipping point (Figure 2I).

#### 416 **A major remodeling of membrane lipids occurs at pH 6.9**

417 To provide an in-depth characterization of the reaction norms at the whole  
418 organism level, we aimed to link the oyster reaction norm established for the macro-  
419 physiological traits described previously to the molecular responses of oysters. We first  
420 analyzed the fatty acid composition of membrane lipids that play an important role in  
421 exchanges between intracellular and extracellular compartments. Principal component  
422 analysis of all fatty acids showed that the first axis (PC1) alone explained 66% of the total  
423 variance in relation to pH (Figure 3A). The set of fatty acids was reduced to two terms  
424 defined by the sums of fatty acids that correlated with PC1 either positively or negatively,  
425 and each term was plotted against pH (Figure 3B-C). Positively correlated fatty acids  
426 mainly consisted of docosahexaenoic acid (DHA, 22:6n-3) and palmitic acid (PA, 16:0)  
427 contributing 43% and 14%, respectively, to PC1 (Supplementary Table 2). This group of

428 fatty acids exhibited a tipping point at pH 6.9, below which their contribution to  
429 membrane decreased markedly (Figure 3B) at the benefit of the fatty acids that were  
430 negatively correlated with PC1. These negatively correlated fatty acids consisted of  
431 arachidonic acid (ARA, 20:4n-6), eicosapentaenoic acid (EPA, 20:5n-3) and non-  
432 methylene interrupted fatty acids (22:2NMI<sub>i,j</sub>), which contributed 12%, 6% and 6%,  
433 respectively, to PC1 (Figure 3C) (Supplementary Table 2).

#### 434 **Expression of most genes shows tipping points at pH 7.3-6.9**

435 To further assess the molecular effects of pH change, we compared by RNA-seq  
436 the transcriptomic responses of oysters exposed to the 15 pH conditions for 23 days. To  
437 do this, we first clustered the differentially expressed genes that co-vary together using  
438 WGCNA analysis and retained the clusters that were correlated with pH (Supplementary  
439 Table 3). Then, we plotted the frequency distribution of pH tipping-point for each cluster  
440 of genes (Figure 4). Owing to this original method, we found that 1054 genes, distributed  
441 in three clusters, showed linear (or loglinear) or piecewise regression with pH  
442 (Supplementary table 3). Among them, 49% showed tipping-points at pH 7.3-6.9 (Figure  
443 4A-C). Expression level of most genes were unchanged between pH conditions down to  
444 the pH tipping point, below which it increased for genes in clusters 1 and 2 (Figure 4A-  
445 B), or decreased for genes in cluster 3 (Figure 4C). Some genes linearly increased for  
446 clusters 1 and 2, or decreased for cluster 3 with decreasing pH.

447 Gene ontology analysis (GO) showed that most of the genes from cluster 1 (42%)  
448 exhibited tipping-points at pH 7.3-6.9 (Figure 4A) and were associated with GO terms  
449 corresponding to the regulation of RNA-transcription, cellular metabolism,  
450 macromolecule biosynthesis and negative regulation of cell-cell adhesion (Table 1). The  
451 expression of another group of genes from cluster 1 (14%) increased linearly (or  
452 loglinearly) with decreasing pH and was associated with GO terms corresponding to

453 GTP-binding, GTPase activity and ribonucleotide metabolism (Table 1). The expression  
454 of most of the genes from cluster 2 (44%) exhibited tipping-points at pH 7.3- 7.0, whereas  
455 another large group of genes (18%) increased linearly (or loglinearly) with decreasing pH  
456 (Figure 4B). These genes were associated with GO terms corresponding to ribosome  
457 synthesis, RNA-binding, translation and protein/amino acid synthesis (Table 1). The  
458 expression of 62% of the genes from cluster 3 exhibited tipping-points at pH 7.2-6.9 and  
459 decreased thereafter (Figure 4C). These genes were associated with GO terms  
460 corresponding to ion transport and more specifically to transmembrane cation transport  
461 (Table 1).

#### 462 **Expression of genes related to biomineralization are affected by pH**

463 We specifically examined the genes that are commonly reported in the scientific  
464 literature as being involved in the calcification process and in the formation of the organic  
465 matrix of the shell and periostracum. We found that the expression of 60% of the 38 genes  
466 involved in the calcification process that were retained by our models showed pH tipping  
467 points between 6.9 and 7.1 (Table 2). These genes encode for calcium-binding proteins,  
468 Ca<sup>2+</sup> signaling pathway, amorphous calcium carbonate-binding proteins and ion  
469 transmembrane transporters. Most of these genes decreased below the tipping-point (n =  
470 14) while others increased (n = 8). The expression of genes associated with the regulation  
471 of the synthesis of the shell organic matrix and the periostracum (n = 11) generally  
472 increased with decreasing pH (Table 2). The relationships were loglinear (n = 3) or  
473 piecewise (n = 8).

474 Among these 38 genes, the family of genes that are the most represented are  
475 coding for acetylcholine receptors, monocarboxylate transporters and tyrosinase  
476 synthesis (Table 2). The expression of four genes coding for acetylcholine receptors  
477 decreased below tipping points at pH 6.9-7.0. The expression of five genes coding for



478 monocarboxylate transporters increased with decreasing pH, and four of them showed pH  
479 tipping points between 7.3 and 6.6. The expression of four genes associated to tyrosinase  
480 synthesis early increased with decreasing pH and three of them showed tipping points  
481 between pH 7.4 and 7.1.

## 482 **Discussion**

483         Here we provide the first reaction norm of juvenile oyster *C. gigas* assessed by  
484 combining macro-physiological traits and micro-molecular characteristics. This novel  
485 approach applied to juvenile oysters exposed to a wide range of pH conditions revealed  
486 that macro-physiological parameters such as growth, calcification, food intake, and  
487 respiration exhibited pH tipping points that coincide with a major reshuffling in  
488 membrane lipids and transcriptome that was previously unappreciated, but others like  
489 shell parameters seemed uncoupled from global effect (Figure 5). This comprehensive  
490 view of the animal response to environment sheds new light on adaptation potential to  
491 climate change.

492         We first identify a global tolerance threshold for juvenile *C. gigas* at pH 6.9-7.3,  
493 corresponding to the tipping points identified for the majority of the examined  
494 parameters. In line with this, several studies based on IPCC scenario assumed the  
495 existence of tipping points below pH 7.5-7.4 for growth, calcification and reproduction  
496 in oysters and mussels (Boulais et al., 2017; Fitzer et al., 2014; Lannig et al., 2010). Below  
497 tipping points, growth, calcification, respiration and feeding rate decreased markedly,  
498 likely reflecting increasing maintenance cost up until reaching critical points that are  
499 representative of metabolic depression (Michaelidis et al., 2005; Sokolova, 2021).  
500 However, these pH tipping points are well below IPCC projections for 2100 and have  
501 unlikely been encountered by mollusks since their appearance on earth 500 million years

502 ago when CO<sub>2</sub> levels were much higher (IPCC, 2019; Krissansen-Totton et al., 2018).  
503 Also, oyster populations do not generally experience such low pH conditions in their  
504 habitats ([https://wwz.ifremer.fr/cocorico2\\_en/Donnees](https://wwz.ifremer.fr/cocorico2_en/Donnees)). Therefore, juvenile oysters  
505 appear to be able to cope with near-future OA.

506 We show here that shell parameters, i.e. thickness, weight and length, were altered  
507 as soon as pH decreased from ambient levels, as already reported for many shellfish  
508 species (Byrne & Fitzer, 2019). Shell thickness is generally related to shell strength and  
509 therefore with protection against predation and resistance to mechanical stress related to  
510 wave exposure and aquaculture processes. Thus, moderate acidification increases  
511 predation risk of young *C. gigas* through reduction of shell strength (Wright et al., 2018).  
512 We also find that respiration rate first increased when pH decreased, suggesting that  
513 metabolism was readily impacted. However, body condition (dry flesh weight) and  
514 energy reserves (TAG-ST and carbohydrate, Supplementary Figure 3) were not affected  
515 by pH, likely because oysters were fed *ad libitum* (Leung et al., 2019; Thomsen et al.,  
516 2013). Finally, we report here a linear increase in the expression level of genes related to  
517 GTPase activity and GTP binding, which are characteristics of stress response in  
518 *Crassostrea* spp. (Yan et al., 2018). Overall, these changes suggest that longer exposure  
519 to moderate acidification (above tipping point) could impair overall oyster fitness.

520 We further show that this reduction in shell parameters was not related to  
521 metabolic depression or to changes in net calcification or global gene expression. In  
522 contrast, a recent meta-analysis on *C. gigas* suggests that OA induces a reduction in shell  
523 thickness that is related to an overall transcriptional change inducing metabolic  
524 depression and alteration of calcification rate (Ducker & Falkenberg, 2020). Here we  
525 revisit these assumptions and find in agreement with other prior studies that no metabolic

526 disruptions occurred while shell strength decreased at pH 7.3-7.7 (NBS scale) (Timmins-  
527 Schiffman et al., 2014; Wright et al., 2018).

528 Concomitantly, a delamination of the periostracum, the organic coat covering the  
529 shell was observed at pH levels above tipping point, probably altering shell protection.  
530 This was reflected by an increase shell bleaching and increased expression of four genes  
531 coding for tyrosinases-like protein. Tyrosinases are involved in periostracum synthesis  
532 and the increase in expression of their related genes is often considered as a mechanism  
533 to limit the damage to the periostracum and the corrosion of the shell in reaction to OA  
534 (Hüning et al., 2013). Delamination of the periostracum due to moderate OA was  
535 frequently associated with alteration of shell properties such as weakening and thinning  
536 (Alma et al., 2020; Auzoux-Bordenave et al., 2019; Bressan et al., 2014; Coleman et al.,  
537 2014; Peck et al., 2016, 2018; Zhao et al., 2020). Our results agree with the idea that OA  
538 is more a dissolution problem than a biomineralization problem (Rajan et al., 2021).

539 This investigation of tipping points at the micro-scale also provides new insights  
540 on the physiological response of oysters to OA. For the first time, we find a major  
541 remodeling of membrane lipids in response to OA and observed a tipping point at pH 6.9.  
542 This remodeling consisted of decreasing the long chain PUFA DHA (22:6n-3) that is  
543 essential for growth and survival (Knauer & Southgate, 1999; Langdon & Waldock,  
544 1981), at the benefit of eicosanoid precursors (ARA, 20:4n-6 and EPA, 20:5n-3) involved  
545 in the stress response (Delaporte et al., 2003). Since membrane fatty acid composition  
546 influences the activity of transmembrane proteins involved in ion transport (Hazel &  
547 Williams, 1990; Hochachka & Somero, 2002), it could also have been related to  
548 regulation of acid-base homeostasis and perhaps calcification under OA.

549 In line with this, we find an overall decrease in expression of genes related to  
550 cation transmembrane transport below tipping points at pH 6.9-7.2 that can be related to

551 alteration of calcification and acid-base homeostasis (Zhao et al., 2020). Concomitantly,  
552 we observe an overall decrease in the expression of genes coding for proteins involved  
553 in the regulation of calcification through calcium signaling pathway, calcium homeostasis,  
554 calmodulin signaling pathway and regulation of calcium carbonate crystal growth (Feng  
555 et al., 2017; Wang et al., 2017; Zhao et al., 2020).

556 In our analysis, we also identify families of genes that must play an important role  
557 in oyster response to OA. Among these genes, we identify four genes coding for  
558 acetylcholine receptors that are known for regulating and ordering the formation of the  
559 shell micro-structure (Feng et al., 2017). We also find five monocarboxylate transporters  
560 coding genes, members of a family of proteins that act as co-transporters of protons H<sup>+</sup>,  
561 that may be involved in the regulation of acid-base homeostasis and calcification process  
562 (Tresguerres et al., 2020; Wang et al., 2020). These proteins also co-transport  
563 monocarboxylates such as lactate or pyruvate and were reported to be involved in the  
564 stress response of oysters through regulation of metabolic pathways (Ertl et al., 2019).

565 In conclusion, we show that juvenile *C. gigas* have a broad tolerance to ocean  
566 acidification, exhibiting tipping points around pH 7.3-6.9 for most parameters (Figure 5).  
567 Nonetheless, we observe that shell parameters change as soon as pH drops, well before  
568 tipping points are reached, suggesting animal fitness is likely to be affected. This thus  
569 raises concerns about the future of natural and farmed oyster populations in a high-CO<sub>2</sub>  
570 world. This new framework for identification of tolerance threshold in organisms  
571 represents a breakthrough in the field of global change research. It was made possible by  
572 (1) combining reaction norm assessment and thorough molecular and biochemical  
573 analyses of animal responses, and (2) developing a procedure to analyze and synthesize  
574 omics data measured over an environmental range. We believe that such an integrative  
575 and holistic approach could now be applied to other organisms and integrate intra-specific

576 variation, life-stage and other stressors such as temperature, nutrition, pollutants or  
577 oxygen levels.

### 578 **Acknowledgments**

579 We are grateful for K. Luge, J. Veillet, C. Quéré, V. Le Roy and I. Queau for their  
580 participation to data recording and the Ifremer staff for their involvement in oyster and  
581 algae production. We thank J. Thebault and E. Dabass for their advices in shell analysis.  
582 We are also grateful for G. Le Moullac for project conception and funding. This work  
583 was funded by the Ocean Acidification Program of the French Foundation for Research  
584 on Biodiversity (FRB - [www.fondationbiodiversite.fr](http://www.fondationbiodiversite.fr)) and the French Ministère de la  
585 transition écologique.

### 586 **Author contributions**

587 ML, CDP, and FP designed and conducted the experiment. All authors analyzed the data.  
588 ML performed statistics. ML and FP wrote the first draft of the document and all authors  
589 contributed and accepted it. FP and JL obtained the funding. This work is part of the PhD  
590 thesis of ML.

### 591 **Data availability**

592 RNA-seq data have been made available through the SRA database (BioProject accession  
593 number PRJNA735889). Other data analyzed during this study are included in this  
594 published article and its supplementary information files or available through the  
595 SEANOE database (<https://doi.org/10.17882/83294>). Complementary information is  
596 available from the corresponding authors on reasonable request.

### 597 **Competing interests**

598 The authors declare no competing interests.

599 **Bibliography**

- 600 Alma, L., Kram, K. E., Holtgrieve, G. W., Barbarino, A., Fiamengo, C. J., & Padilla-  
601 Gamiño, J. L. (2020). Ocean acidification and warming effects on the physiology,  
602 skeletal properties, and microbiome of the purple-hinge rock scallop.  
603 *Comparative Biochemistry and Physiology Part A: Molecular & Integrative*  
604 *Physiology*, 240, 110579. <https://doi.org/10.1016/j.cbpa.2019.110579>
- 605 Aminot, A., & K erouel, R. (2007). *Dosage automatique des nutriments dans les eaux*  
606 *marines* (MEDD, Editions Quae). Ifremer.  
607 [https://www.quae.com/produit/924/9782759200238/dosage-automatique-des-](https://www.quae.com/produit/924/9782759200238/dosage-automatique-des-nutriments-dans-les-eaux-marines)  
608 [nutriments-dans-les-eaux-marines](https://www.quae.com/produit/924/9782759200238/dosage-automatique-des-nutriments-dans-les-eaux-marines)
- 609 Auzoux-Bordenave, S., Wessel, N., Badou, A., Martin, S., M'Zoudi, S., Avignon, S.,  
610 Roussel, S., Huchette, S., & Dubois, P. (2019). Ocean acidification impacts  
611 growth and shell mineralization in juvenile abalone (*Haliotis tuberculata*). *Marine*  
612 *Biology*, 167(1), 11. <https://doi.org/10.1007/s00227-019-3623-0>
- 613 Bayne, B. L. (2017). *Biology of Oysters* (Vol. 41). Academic Press.
- 614 Boulais, M., Chenevert, K. J., Demey, A. T., Darrow, E. S., Robison, M. R., Roberts, J.  
615 P., & Volety, A. (2017). Oyster reproduction is compromised by acidification  
616 experienced seasonally in coastal regions. *Scientific Reports*, 7(1), 13276.  
617 <https://doi.org/10.1038/s41598-017-13480-3>
- 618 Bressan, M., Chinellato, A., Munari, M., Matozzo, V., Mancini, A., Mar eta, T., Finos, L.,  
619 Moro, I., Pastore, P., Badocco, D., & Marin, M. G. (2014). Does seawater  
620 acidification affect survival, growth and shell integrity in bivalve juveniles?  
621 *Marine Environmental Research*, 99, 136–148.  
622 <https://doi.org/10.1016/j.marenvres.2014.04.009>

- 623 Browman, H. I. (2017). Towards a broader perspective on ocean acidification research.  
624 *ICES Journal of Marine Science*, 74(4), 889–894.  
625 <https://doi.org/10.1093/icesjms/fsx073>
- 626 Byrne, M., & Fitzer, S. (2019). The impact of environmental acidification on the  
627 microstructure and mechanical integrity of marine invertebrate skeletons.  
628 *Conservation Physiology*, 7(1), 62–82. <https://doi.org/10.1093/conphys/coz062>
- 629 Caldeira, K., & Wickett, M. E. (2003). Anthropogenic carbon and ocean pH. *Nature*,  
630 425(6956), 365–365. <https://doi.org/10.1038/425365a>
- 631 Coleman, D., Byrne, M., & Davis, A. (2014). Molluscs on acid: Gastropod shell repair  
632 and strength in acidifying oceans. *Marine Ecology Progress Series*, 509, 203–211.  
633 <https://doi.org/10.3354/meps10887>
- 634 Comeau, S., Edmunds, P. J., Spindel, N. B., & Carpenter, R. C. (2013). The responses of  
635 eight coral reef calcifiers to increasing partial pressure of CO<sub>2</sub> do not exhibit a  
636 tipping point. *Limnology and Oceanography*, 58(1), 388–398.  
637 <https://doi.org/10.4319/lo.2013.58.1.0388>
- 638 Delaporte, M., Soudant, P., Moal, J., Lambert, C., Quéré, C., Miner, P., Choquet, G.,  
639 Paillard, C., & Samain, J.-F. (2003). Effect of a mono-specific algal diet on  
640 immune functions in two bivalve species—*Crassostrea gigas* and *Ruditapes*  
641 *philippinarum*. *Journal of Experimental Biology*, 206(17), 3053–3064.  
642 <https://doi.org/10.1242/jeb.00518>
- 643 Dickson, A. G., Sabine, C. L., & Christian, J. R. (2007). *Guide to Best Practices for*  
644 *Ocean CO<sub>2</sub> Measurements* (PICES Special Publication 3). North Pacific Marine  
645 Science Organization. [https://www.ncei.noaa.gov/access/ocean-carbon-data-](https://www.ncei.noaa.gov/access/ocean-carbon-data-system/oceans/Handbook_2007.html)  
646 [system/oceans/Handbook\\_2007.html](https://www.ncei.noaa.gov/access/ocean-carbon-data-system/oceans/Handbook_2007.html)

- 647 Dorey, N., Lançon, P., Thorndyke, M., & Dupont, S. (2013). Assessing physiological  
648 tipping point of sea urchin larvae exposed to a broad range of pH. *Global Change*  
649 *Biology*, 19(11), 3355–3367. <https://doi.org/10.1111/gcb.12276>
- 650 DuBois, Michel., Gilles, K. A., Hamilton, J. K., Rebers, P. A., & Smith, Fred. (1956).  
651 Colorimetric Method for Determination of Sugars and Related Substances.  
652 *Analytical Chemistry*, 28(3), 350–356. <https://doi.org/10.1021/ac60111a017>
- 653 Ducker, J., & Falkenberg, L. J. (2020). How the Pacific Oyster Responds to Ocean  
654 Acidification: Development and Application of a Meta-Analysis Based Adverse  
655 Outcome Pathway. *Frontiers in Marine Science*, 7(7), 398–408.
- 656 Ertl, N. G., O'Connor, W. A., & Elizur, A. (2019). Molecular effects of a variable  
657 environment on Sydney rock oysters, *Saccostrea glomerata*: Thermal and low  
658 salinity stress, and their synergistic effect. *Marine Genomics*, 43, 19–32.  
659 <https://doi.org/10.1016/j.margen.2018.10.003>
- 660 FAO. (2020). *The State of World Fisheries and Aquaculture 2020. In brief. Sustainability*  
661 *in action*. Rome.
- 662 Feng, D., Li, Q., Yu, H., Kong, L., & Du, S. (2017). Identification of conserved proteins  
663 from diverse shell matrix proteome in *Crassostrea gigas*: Characterization of  
664 genetic bases regulating shell formation. *Scientific Reports*, 7(1), 45–54.  
665 <https://doi.org/10.1038/srep45754>
- 666 Fitzer, S. C., Phoenix, V. R., Cusack, M., & Kamenos, N. A. (2014). Ocean acidification  
667 impacts mussel control on biomineralisation. *Scientific Reports*, 4(1), 6218.  
668 <https://doi.org/10.1038/srep06218>
- 669 Gazeau, F., Parker, L. M., Comeau, S., Gattuso, J.-P., O'Connor, W. A., Martin, S.,  
670 Pörtner, H.-O., & Ross, P. M. (2013). Impacts of ocean acidification on marine



- 671           shelled molluscs. *Marine Biology*, 160(8), 2207–2245.  
672           <https://doi.org/10.1007/s00227-013-2219-3>
- 673   Gazeau, F., Urbini, L., Cox, T. E., Alliouane, S., & Gattuso, J.-P. (2015). Comparison of  
674           the alkalinity and calcium anomaly techniques to estimate rates of net  
675           calcification. *Marine Ecology Progress Series*, 527, 1–12.  
676           <https://doi.org/10.3354/meps11287>
- 677   Hazel, J. R., & Williams, E. (1990). The role of alterations in membrane lipid composition  
678           in enabling physiological adaptation of organisms to their physical environment.  
679           *Progress in Lipid Research*, 29(3), 167–227. [https://doi.org/10.1016/0163-](https://doi.org/10.1016/0163-7827(90)90002-3)  
680           7827(90)90002-3
- 681   Hochachka, P. W., & Somero, G. (2002). Biochemical adaptation: Mechanism and  
682           process in physiological evolution. *Biochemistry and Molecular Biology*  
683           *Education*, 30(3), 215–216. <https://doi.org/10.1002/bmb.2002.494030030071>
- 684   Hulbert, A. J., & Else, P. L. (1999). Membranes as possible pacemakers of metabolism.  
685           *Journal of Theoretical Biology*, 199(3), 257–274.  
686           <https://doi.org/10.1006/jtbi.1999.0955>
- 687   Hüning, A. K., Melzner, F., Thomsen, J., Gutowska, M. A., Krämer, L., Frickenhaus, S.,  
688           Rosenstiel, P., Pörtner, H.-O., Philipp, E. E. R., & Lucassen, M. (2013). Impacts  
689           of seawater acidification on mantle gene expression patterns of the Baltic Sea blue  
690           mussel: Implications for shell formation and energy metabolism. *Marine Biology*,  
691           160(8), 1845–1861.
- 692   IPCC. (2019). *IPCC Special Report on the Ocean and Cryosphere in a Changing*  
693           *Climate: Vol. (eds Pörtner, H. O. et al.)* (H. O. Pörtner, D. C. Roberts, V. Masson-  
694           Delmotte, P. Zhai, M. Tignor, E. Poloczanska, K. Mintenbeck, A. Alegria, M.  
695           Nicolai, A. Okem, J. Petzold, B. Rama, & N. M. Weyer, Eds.; H.-O. Pörtner, D.C.

- 696 Roberts, V. Masson-Delmotte, P. Zhai, M. Tignor, E. Poloczanska, K.  
697 Mintenbeck, A. Alegría, M. Nicolai, A. Okem, J. Petzold, B. Rama, N.M. Weyer  
698 (eds.)). In. press.
- 699 IPCC. (2021). *Climate Change 2021: The Physical Science Basis. Contribution of*  
700 *Working Group I to the Sixth Assessment Report of the Intergovernmental Panel*  
701 *on Climate Change: Vol. (eds Masson-Delmotte, V. P. et al.)*. Cambridge  
702 University Press. In Press.
- 703 Klopfenstein, D. V., Zhang, L., Pedersen, B. S., Ramírez, F., Warwick Vesztröcy, A.,  
704 Naldi, A., Mungall, C. J., Yunes, J. M., Botvinnik, O., Weigel, M., Dampier, W.,  
705 Dessimoz, C., Flick, P., & Tang, H. (2018). GOATOOLS: A Python library for  
706 Gene Ontology analyses. *Scientific Reports*, 8(1), 10872.  
707 <https://doi.org/10.1038/s41598-018-28948-z>
- 708 Knauer, J., & Southgate, P. C. (1999). A Review of the Nutritional Requirements of  
709 Bivalves and the Development of Alternative and Artificial Diets for Bivalve  
710 Aquaculture. *Reviews in Fisheries Science*, 7(3–4), 241–280.  
711 <https://doi.org/10.1080/10641269908951362>
- 712 Krissansen-Totton, J., Arney, G. N., & Catling, D. C. (2018). Constraining the climate  
713 and ocean pH of the early Earth with a geological carbon cycle model.  
714 *Proceedings of the National Academy of Sciences*, 115(16), 4105–4110.  
715 <https://doi.org/10.1073/pnas.1721296115>
- 716 Kroeker, K. J., Kordas, R. L., Crim, R., Hendriks, I. E., Ramajo, L., Singh, G. S., Duarte,  
717 C. M., & Gattuso, J.-P. (2013). Impacts of ocean acidification on marine  
718 organisms: Quantifying sensitivities and interaction with warming. *Global*  
719 *Change Biology*, 19(6), 1884–1896. <https://doi.org/10.1111/gcb.12179>

- 720 Langdon, C. J., & Waldock, M. J. (1981). The effect of algal and artificial diets on the  
721 growth and fatty acid composition of *Crassostrea gigas* Spat. *Journal of the*  
722 *Marine Biological Association of the United Kingdom*, 61(2), 431–448.  
723 <https://doi.org/10.1017/S0025315400047056>
- 724 Langfelder, P., & Horvath, S. (2008). WGCNA: An R package for weighted correlation  
725 network analysis. *BMC Bioinformatics*, 9, 559. [https://doi.org/10.1186/1471-](https://doi.org/10.1186/1471-2105-9-559)  
726 [2105-9-559](https://doi.org/10.1186/1471-2105-9-559)
- 727 Lannig, G., Eilers, S., Pörtner, H. O., Sokolova, I. M., & Bock, C. (2010). Impact of  
728 Ocean Acidification on Energy Metabolism of Oyster, *Crassostrea gigas*—  
729 Changes in Metabolic Pathways and Thermal Response. *Marine Drugs*, 8(8),  
730 2318–2339. <https://doi.org/10.3390/md8082318>
- 731 Lee, H.-G., Stumpp, M., Yan, J.-J., Tseng, Y.-C., Heinzl, S., & Hu, M. Y.-A. (2019).  
732 Tipping points of gastric pH regulation and energetics in the sea urchin larva  
733 exposed to CO<sub>2</sub> -induced seawater acidification. *Comparative Biochemistry and*  
734 *Physiology Part A: Molecular & Integrative Physiology*, 234, 87–97.  
735 <https://doi.org/10.1016/j.cbpa.2019.04.018>
- 736 Leung, J. Y. S., Doubleday, Z. A., Nagelkerken, I., Chen, Y., Xie, Z., & Connell, S. D.  
737 (2019). How calorie-rich food could help marine calcifiers in a CO<sub>2</sub>-rich future.  
738 *Proceedings of the Royal Society B: Biological Sciences*, 286(1906), 20190757.  
739 <https://doi.org/10.1098/rspb.2019.0757>
- 740 Matz, M. V. (2018). Fantastic Beasts and How To Sequence Them: Ecological Genomics  
741 for Obscure Model Organisms. *Trends in Genetics: TIG*, 34(2), 121–132.  
742 <https://doi.org/10.1016/j.tig.2017.11.002>

- 743 Michaelidis, B., Ouzounis, C., Paleras, A., & Pörtner, H. (2005). *Effects of long-term*  
744 *moderate hypercapnia on acid-base balance and growth rate in marine mussels*  
745 *(Mytilus galloprovincialis)*. 293, 109–118. <https://doi.org/10.3354/MEPS293109>
- 746 Orr, J. C., Fabry, V. J., Aumont, O., Bopp, L., Doney, S. C., Feely, R. A., Gnanadesikan,  
747 A., Gruber, N., Ishida, A., Joos, F., Key, R. M., Lindsay, K., Maier-Reimer, E.,  
748 Matear, R., Monfray, P., Mouchet, A., Najjar, R. G., Plattner, G.-K., Rodgers, K.  
749 B., ... Yool, A. (2005). Anthropogenic ocean acidification over the twenty-first  
750 century and its impact on calcifying organisms. *Nature*, 437(7059), 681–686.  
751 <https://doi.org/10.1038/nature04095>
- 752 Peck, V. L., Oakes, R. L., Harper, E. M., Manno, C., & Tarling, G. A. (2018). Pteropods  
753 counter mechanical damage and dissolution through extensive shell repair. *Nature*  
754 *Communications*, 9(1), 264. <https://doi.org/10.1038/s41467-017-02692-w>
- 755 Peck, V. L., Tarling, G. A., Manno, C., Harper, E. M., & Tynan, E. (2016). Outer organic  
756 layer and internal repair mechanism protects pteropod *Limacina helicina* from  
757 ocean acidification. *Deep Sea Research Part II: Topical Studies in Oceanography*,  
758 127, 41–52. <https://doi.org/10.1016/j.dsr2.2015.12.005>
- 759 Peñaloza, C., Gutierrez, A. P., Eöry, L., Wang, S., Guo, X., Archibald, A. L., Bean, T. P.,  
760 & Houston, R. D. (2021). A chromosome-level genome assembly for the Pacific  
761 oyster *Crassostrea gigas*. *GigaScience*, 10(3).  
762 <https://doi.org/10.1093/gigascience/giab020>
- 763 Petton, B., Boudry, P., Alunno-Bruscia, M., & Pernet, F. (2015). Factors influencing  
764 disease-induced mortality of Pacific oysters *Crassostrea gigas*. *Aquaculture*  
765 *Environment Interactions*, 6(3), 205–222. <https://doi.org/10.3354/aei00125>

- 766 Rajan, K. C., Meng, Y., Yu, Z., Roberts, S. B., & Vengatesen, T. (2021). Oyster  
767 biomineralization under ocean acidification: From genes to shell. *Global Change*  
768 *Biology*, 27(16), 3779–3797. <https://doi.org/10.1111/gcb.15675>
- 769 Rico-Villa, B., Pouvreau, S., & Robert, R. (2009). Influence of food density and  
770 temperature on ingestion, growth and settlement of Pacific oyster larvae,  
771 *Crassostrea gigas*. *Aquaculture*, 287(3), 395–401.  
772 <https://doi.org/10.1016/j.aquaculture.2008.10.054>
- 773 Schneider, C. A., Rasband, W. S., & Eliceiri, K. W. (2012). NIH Image to ImageJ: 25  
774 years of image analysis. *Nature Methods*, 9(7), 671–675.  
775 <https://doi.org/10.1038/nmeth.2089>
- 776 Smith, S. V., & Key, G. S. (1975). Carbon dioxide and metabolism in marine  
777 environments. *Limnology and Oceanography*, 20(3), 493–495.  
778 <https://doi.org/10.4319/lo.1975.20.3.0493>
- 779 Sokolova, I. M. (2021). Bioenergetics in environmental adaptation and stress tolerance of  
780 aquatic ectotherms: Linking physiology and ecology in a multi-stressor landscape.  
781 *Journal of Experimental Biology*, 224(Suppl 1).  
782 <https://doi.org/10.1242/jeb.236802>
- 783 Strader, M. E., Wong, J. M., & Hofmann, G. E. (2020). Ocean acidification promotes  
784 broad transcriptomic responses in marine metazoans: A literature survey.  
785 *Frontiers in Zoology*, 17(1), 7–30. <https://doi.org/10.1186/s12983-020-0350-9>
- 786 Thomsen, J., Casties, I., Pansch, C., Körtzinger, A., & Melzner, F. (2013). Food  
787 availability outweighs ocean acidification effects in juvenile *Mytilus edulis*:  
788 Laboratory and field experiments. *Global Change Biology*, 19(4), 1017–1027.  
789 <https://doi.org/10.1111/gcb.12109>

- 790 Timmins-Schiffman, E., Coffey, W. D., Hua, W., Nunn, B. L., Dickinson, G. H., &  
791 Roberts, S. B. (2014). Shotgun proteomics reveals physiological response to  
792 ocean acidification in *Crassostrea gigas*. *BMC Genomics*, *15*(1), 951.  
793 <https://doi.org/10.1186/1471-2164-15-951>
- 794 Tresguerres, M., Clifford, A. M., Harter, T. S., Roa, J. N., Thies, A. B., Yee, D. P., &  
795 Brauner, C. J. (2020). Evolutionary links between intra- and extracellular acid–  
796 base regulation in fish and other aquatic animals. *Journal of Experimental*  
797 *Zoology Part A: Ecological and Integrative Physiology*, *333*(6), 449–465.  
798 <https://doi.org/10.1002/jez.2367>
- 799 Tresguerres, M., & Hamilton, T. J. (2017). Acid–base physiology, neurobiology and  
800 behaviour in relation to CO<sub>2</sub>-induced ocean acidification. *Journal of*  
801 *Experimental Biology*, *220*(12), 2136–2148. <https://doi.org/10.1242/jeb.144113>
- 802 Vargas, C. A., Lagos, N. A., Lardies, M. A., Duarte, C., Manríquez, P. H., Aguilera, V.  
803 M., Broitman, B., Widdicombe, S., & Dupont, S. (2017). Species-specific  
804 responses to ocean acidification should account for local adaptation and adaptive  
805 plasticity. *Nature Ecology & Evolution*, *1*(4), 1–7.  
806 <https://doi.org/10.1038/s41559-017-0084>
- 807 Ventura, A., Schulz, S., & Dupont, S. (2016). Maintained larval growth in mussel larvae  
808 exposed to acidified under-saturated seawater. *Scientific Reports*, *6*(1), 23728.  
809 <https://doi.org/10.1038/srep23728>
- 810 Waldbusser, G. G., & Salisbury, J. E. (2014). Ocean Acidification in the Coastal Zone  
811 from an Organism’s Perspective: Multiple System Parameters, Frequency  
812 Domains, and Habitats. *Annual Review of Marine Science*, *6*(1), 221–247.  
813 <https://doi.org/10.1146/annurev-marine-121211-172238>

- 814 Wang, X., Wang, M., Jia, Z., Song, X., Wang, L., & Song, L. (2017). A shell-formation  
815 related carbonic anhydrase in *Crassostrea gigas* modulates intracellular calcium  
816 against CO<sub>2</sub> exposure: Implication for impacts of ocean acidification on mollusk  
817 calcification. *Aquatic Toxicology*, *189*, 216–228.  
818 <https://doi.org/10.1016/j.aquatox.2017.06.009>
- 819 Wang, X., Wang, M., Wang, W., Liu, Z., Xu, J., Jia, Z., Chen, H., Qiu, L., Lv, Z., Wang,  
820 L., & Song, L. (2020). Transcriptional changes of Pacific oyster *Crassostrea gigas*  
821 reveal essential role of calcium signal pathway in response to CO<sub>2</sub>-driven  
822 acidification. *The Science of the Total Environment*, *741*, 140177.  
823 <https://doi.org/10.1016/j.scitotenv.2020.140177>
- 824 Wood, S. N. (2001). Minimizing Model Fitting Objectives That Contain Spurious Local  
825 Minima by Bootstrap Restarting. *Biometrics*, *57*(1), 240–244.  
826 <https://doi.org/10.1111/j.0006-341X.2001.00240.x>
- 827 Wright, J. M., Parker, L. M., O'Connor, W. A., Scanes, E., & Ross, P. M. (2018). Ocean  
828 acidification affects both the predator and prey to alter interactions between the  
829 oyster *Crassostrea gigas* (Thunberg, 1793) and the whelk *Tenguellia marginalba*  
830 (Blainville, 1832). *Marine Biology*, *165*(3), 46. [https://doi.org/10.1007/s00227-](https://doi.org/10.1007/s00227-018-3302-6)  
831 [018-3302-6](https://doi.org/10.1007/s00227-018-3302-6)
- 832 Yan, L., Li, Y., Wang, Z., Su, J., Yu, R., Yan, X., Ma, P., & Cui, Y. (2018). Stress  
833 response to low temperature: Transcriptomic characterization in *Crassostrea*  
834 *sikamea* × *Crassostrea angulata* hybrids. *Aquaculture Research*, *49*(10), 3374–  
835 3385. <https://doi.org/10.1111/are.13801>
- 836 Zhao, X., Han, Y., Chen, B., Xia, B., Qu, K., & Liu, G. (2020). CO<sub>2</sub>-driven ocean  
837 acidification weakens mussel shell defense capacity and induces global molecular

838            compensatory            responses.            *Chemosphere*,            243,            125415.

839            <https://doi.org/10.1016/j.chemosphere.2019.125415>

840



841 **Figure captions**

842 **Figure 1.** Oysters exposed to 15 pH conditions for 23 d. Five oysters were selected from  
843 each condition, and sorted from the smallest to the biggest. Corresponding pH (total scale)  
844 and saturation states of seawater with respect to calcite ( $\Omega_{CA}$ ) are shown.

845 **Figure 2.** Biometry and physiological rates of oysters as a function of pH (total scale).  
846 (A) shell length, (B) shell thickness, (C) shell weight, (D) growth rate in shell length, (E)  
847 growth rate in total body weight (TW), (F) dry flesh weight, (E) net calcification rate, (H)  
848 ingestion rate and (I) respiration rate. Data are means  $\pm$  SD when available. Tipping points  
849 and critical points and their 95% confidence intervals are shown in grey and red,  
850 respectively. The significance levels of the slopes are presented using symbols ( $P < 0.001$   
851 \*\*\*,  $< 0.01$  \*\*,  $< 0.05$  \*,  $< 0.1$  ·).

852 **Figure 3.** Membrane fatty acid (FA) composition of oysters as a function of pH (total  
853 scale). (A) Principal component analysis of polar fatty acid classes for oysters ( $n = 15$   
854 pools of five oysters) exposed to 15 pH levels. Arrows represent fatty acids contributing  
855 to more than 5% of the first principal component (PC1). Individuals are colored according  
856 to the average pH. Contribution to membrane of the sum of fatty acids that are (B)  
857 positively or (C) negatively correlated to PC1 as a function of pH. Tipping points and  
858 their 95% confidence intervals are shown in grey. The significance levels of the slopes  
859 are presented using symbols ( $P < 0.001$  \*\*\*,  $< 0.01$  \*\*,  $< 0.05$  \*,  $< 0.1$  ·).

860 **Figure 4.** Tipping points of oyster transcriptome. (A-C) Frequency distribution of  
861 tipping-point for piecewise linear relationships (left side). Linear and loglinear models  
862 (no tipping-point) are under “Lin” name. Genes are grouped into three clusters of genes  
863 that co-vary together. The grey line indicates the distribution frequency of all genes  
864 irrespective of clusters. Groups of genes which exhibit neighboring tipping points with  
865 distribution frequencies  $> 5\%$  (shown as a dotted line), were grouped together. The

866 segments above the bars indicate the groups of genes on which GO analyses were  
867 conducted. In each case, the gene that best represents the cluster according to module  
868 membership, gene significance for pH and  $R^2$  is presented as a function of pH as an  
869 example (right side). Tipping points and their 95% confidence intervals are shown in  
870 grey. The significance levels of the slopes are presented using stars ( $P < 0.001$  \*\*\*,  $p < 0.01$   
871 \*\*,  $p < 0.05$  \*). Gene names are: LOC117690205: monocarboxylate transporter 12-like,  
872 LOC105317113: 60S ribosomal protein L10a, LOC105331560: protocadherin Fat 4  
873 **Figure 5.** Graphical summary of the reaction norm of juvenile oysters *Crassostrea gigas*  
874 over a wide range of pH conditions. Abbreviations: GO, gene ontology term; ARA,  
875 arachidonic acid, EPA, ecosapentaenoic acid, DHA, docosahexaenoic acid, NMI, non-  
876 methylene interrupted.

877

878 **Figures**

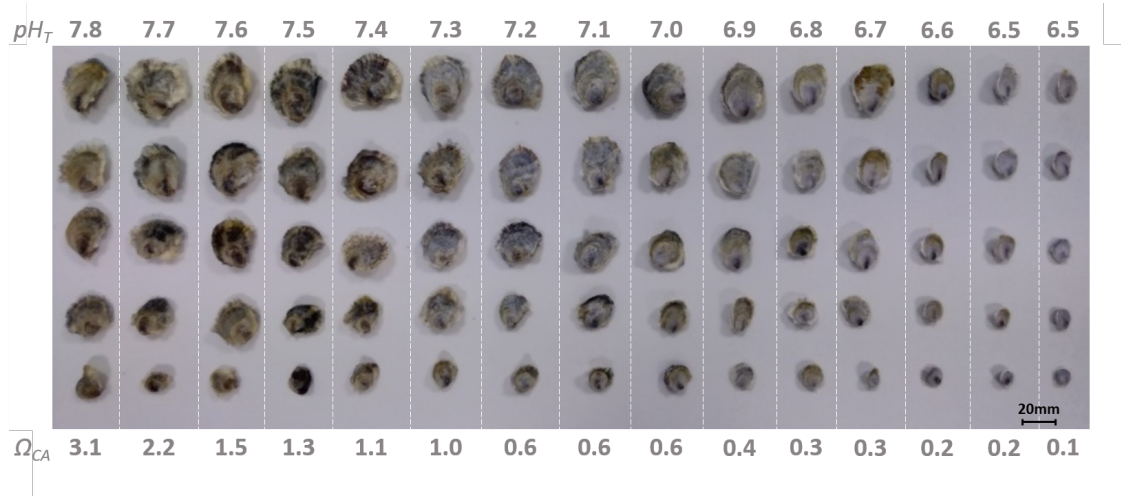

879

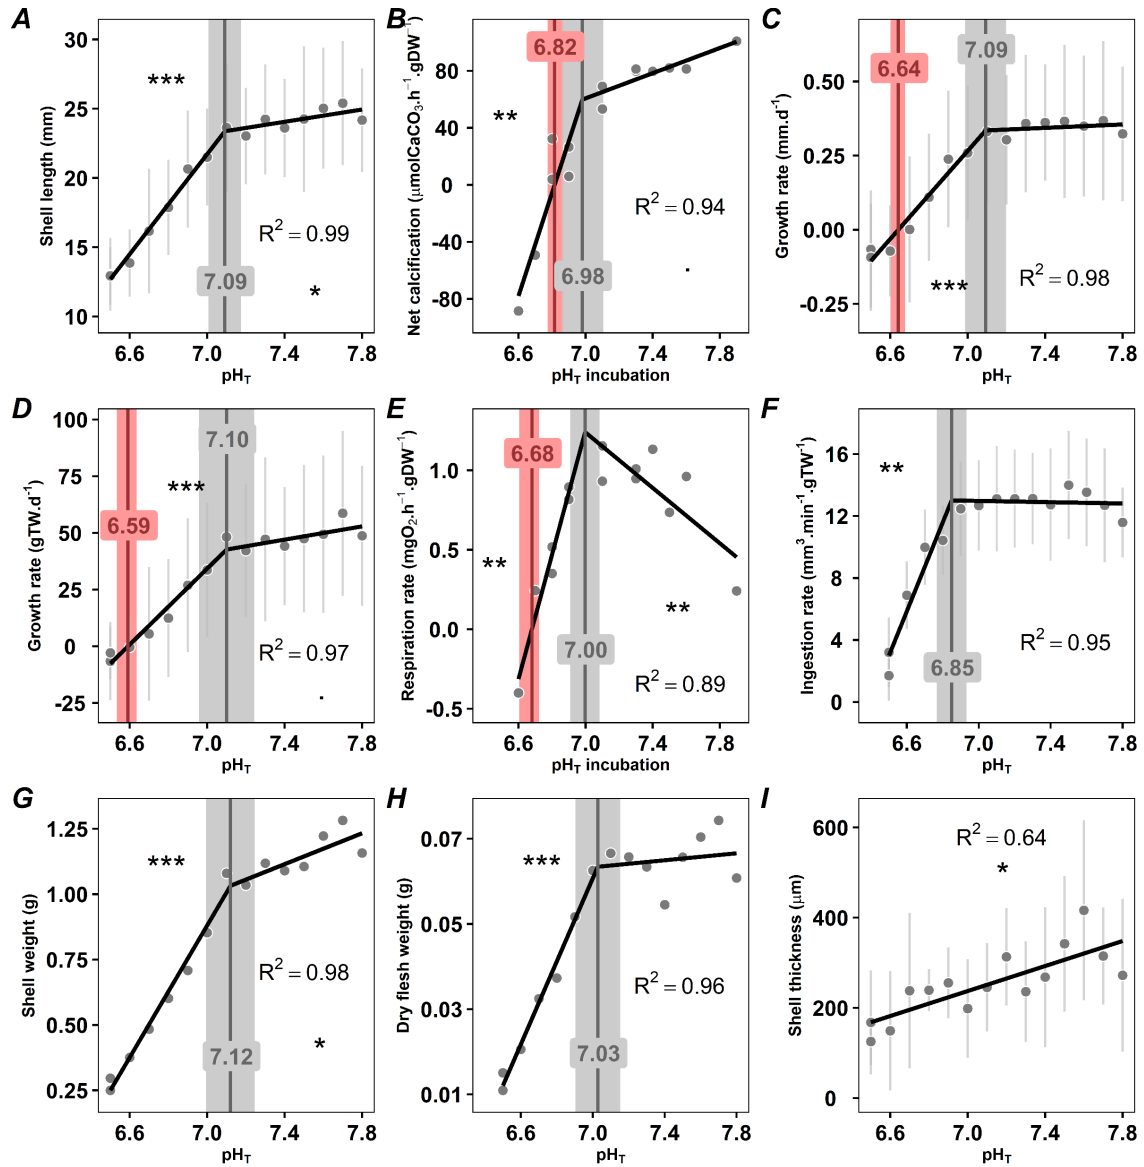

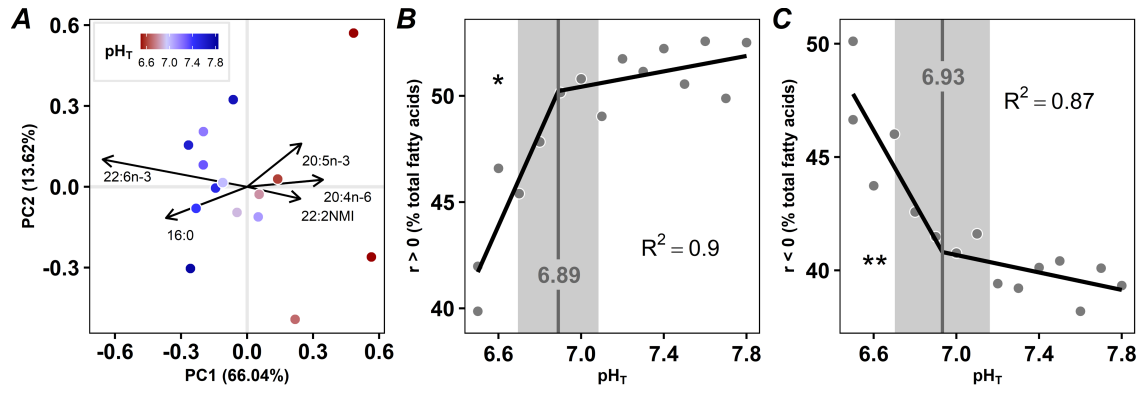

881

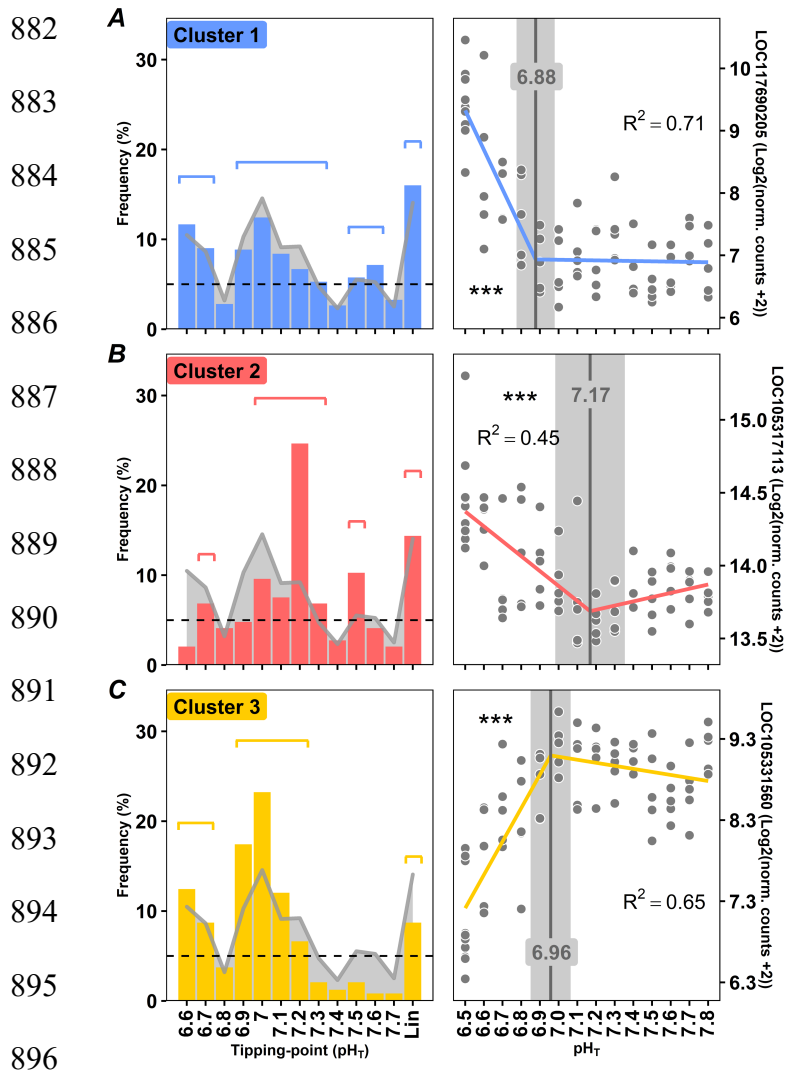

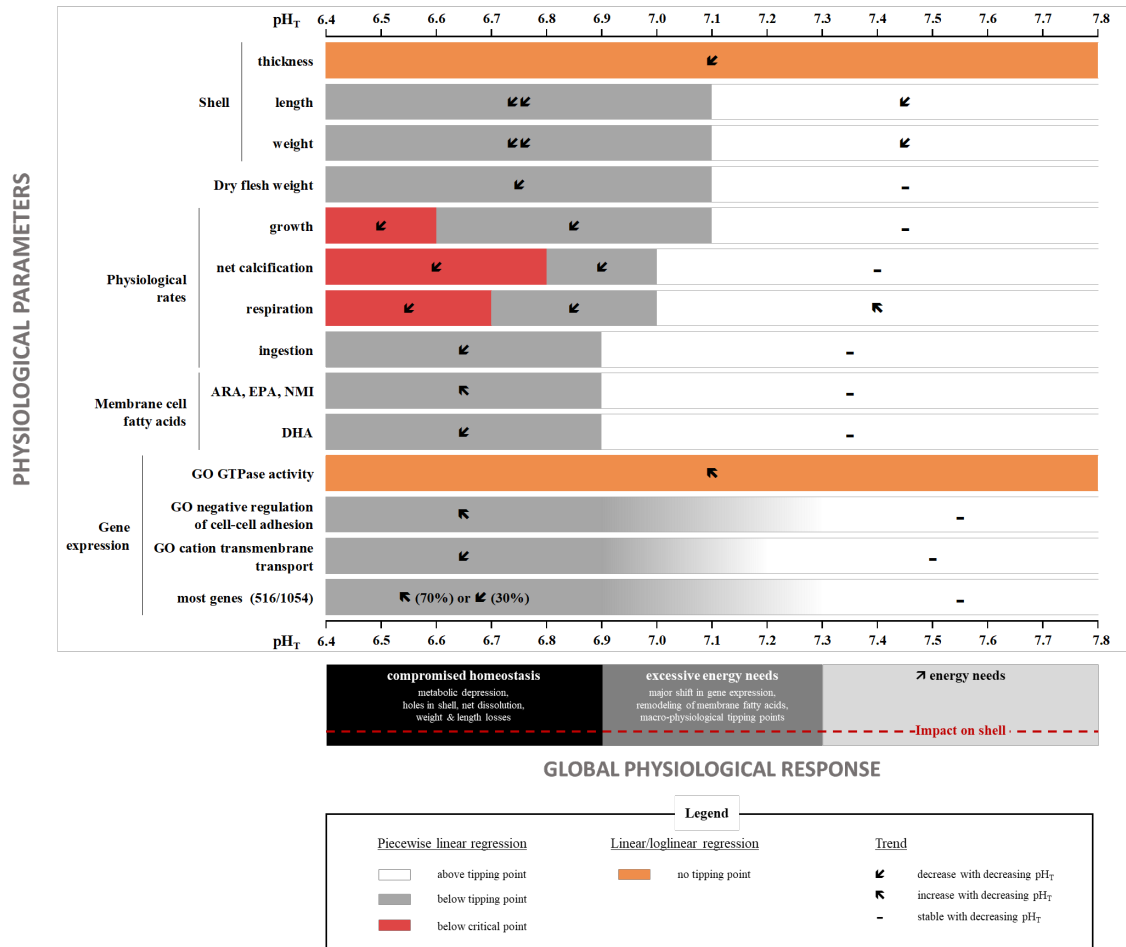

898 **Table 1** Gene ontology term enrichment and tipping point. Model characteristics,  
 899 physiological function and gene ontology for each cluster. For each GO term, the P-  
 900 value of Bonferroni test is displayed using symbols ( $P < 0.001$  \*\*\*,  $< 0.01$  \*\*,  $< 0.05$  \*,  
 901  $< 0.1$  ·). Abbreviations: TP: tipping point

| Cluster         | Models                                |                         |                            | Physiological<br>function                                 | Gene Ontology   |                                                                 |                            |                                                       |                 |                                     |
|-----------------|---------------------------------------|-------------------------|----------------------------|-----------------------------------------------------------|-----------------|-----------------------------------------------------------------|----------------------------|-------------------------------------------------------|-----------------|-------------------------------------|
|                 | <i>shape of the<br/>relationship</i>  | <i>TP<br/>range</i>     | <i>number of<br/>genes</i> |                                                           | <i>GO</i>       | <i>name</i>                                                     | <i>number of<br/>genes</i> | <i>p<br/>bonferroni</i>                               |                 |                                     |
| 1               | ↖                                     | 6.9-7.3                 | 283                        | regulation of<br>RNA-transcription                        | .....GO:1903506 | regulation of nucleic acid-<br>templated transcription          | 38                         | **                                                    |                 |                                     |
|                 |                                       |                         |                            |                                                           | .....GO:0006357 | regulation of transcription<br>by RNA polymerase II             | 30                         | ***                                                   |                 |                                     |
|                 |                                       |                         |                            | cellular<br>metabolism &<br>macromolecule<br>byosynthesis | .....GO:2000112 | regulation of cellular<br>macromolecule<br>biosynthetic process | 41                         | *                                                     |                 |                                     |
|                 |                                       |                         |                            |                                                           | .....GO:0031325 | positive regulation of<br>cellular metabolic process            | 39                         | *                                                     |                 |                                     |
|                 |                                       |                         |                            |                                                           | .....GO:0022408 | negative regulation of<br>cell-cell adhesion                    | 8                          | •                                                     |                 |                                     |
|                 |                                       |                         |                            | GTP metabolism                                            | .....GO:0003924 | GTPase activity                                                 | 8                          | **                                                    |                 |                                     |
|                 |                                       |                         |                            |                                                           | .....GO:0005525 | GTP binding                                                     | 9                          | *                                                     |                 |                                     |
|                 |                                       |                         |                            | ribonucleotide<br>metabolism                              | n.a.            | 96                                                              | .....GO:0032561            | guanyl ribonucleotide<br>binding                      | 9               | •                                   |
|                 |                                       |                         |                            |                                                           |                 |                                                                 | .....GO:0032550            | purine ribonucleoside<br>binding                      | 9               | •                                   |
|                 |                                       |                         |                            | 2                                                         | ↖               | 7.0-7.3                                                         | 62                         | ribosome synthesis<br>/ ribosomal<br>subunit assembly | .....GO:0000027 | ribosomal large subunit<br>assembly |
| .....GO:0022625 | cytosolic large ribosomal<br>subunit  | 10                      | ***                        |                                                           |                 |                                                                 |                            |                                                       |                 |                                     |
| .....GO:0022627 | cytosolic small ribosomal<br>subunit  | 6                       | ***                        |                                                           |                 |                                                                 |                            |                                                       |                 |                                     |
| .....GO:0022618 | ribonucleoprotein<br>complex assembly | 6                       | *                          |                                                           |                 |                                                                 |                            |                                                       |                 |                                     |
| RNA-binding     | .....GO:1990932                       | 5.8S rRNA binding       | 3                          |                                                           |                 |                                                                 |                            | ***                                                   |                 |                                     |
|                 | .....GO:0019843                       | rRNA binding            | 8                          |                                                           |                 |                                                                 |                            | ***                                                   |                 |                                     |
|                 | .....GO:0003729                       | mRNA binding            | 6                          |                                                           |                 |                                                                 |                            | *                                                     |                 |                                     |
| translation     | .....GO:0002181                       | cytoplasmic translation | 8                          |                                                           |                 |                                                                 |                            | ***                                                   |                 |                                     |



|   |    |         |     |                                                 |                 |                                           |    |     |
|---|----|---------|-----|-------------------------------------------------|-----------------|-------------------------------------------|----|-----|
|   |    |         |     | protein & amino acids synthesis                 | .....GO:0043604 | amide biosynthetic process                | 25 | *** |
|   |    |         |     |                                                 | .....GO:0043043 | peptide biosynthetic process              | 25 | *** |
|   |    |         |     | ribosome synthesis / ribosomal subunit assembly | .....GO:0022627 | cytosolic small ribosomal subunit         | 3  | **  |
|   |    |         |     |                                                 | .....GO:0022625 | cytosolic large ribosomal subunit         | 6  | *** |
|   |    |         |     | translation                                     | .....GO:0006412 | translation                               | 10 | *** |
|   | ↖  | n.a.    | 25  | RNA processing                                  | .....GO:0006364 | rRNA processing                           | 4  | •   |
|   |    |         |     | protein & amino acids synthesis                 | .....GO:0043043 | peptide biosynthetic process              | 10 | *** |
|   |    |         |     |                                                 | .....GO:0043604 | amide biosynthetic process                | 11 | *** |
| 3 |    |         |     |                                                 | .....GO:0006811 | ion transport inorganic cation            | 19 | **  |
|   | ↙↙ | 6.9-7.2 | 150 | ion transport                                   | .....GO:0022890 | transmembrane transporter activity        | 14 | *   |
|   |    |         |     |                                                 | .....GO:0008324 | cation transmembrane transporter activity | 14 | •   |

902

903

904 **Table 2** Tipping points of genes related to calcification and production of the shell  
 905 organic matrix. Model characteristics and physiological function are reported for each  
 906 gene. The slope inclination is displayed using arrows only if it is significant according to  
 907 Student t tests ( $P < 0.05$ ). Abbreviations: TP: tipping point, CBP: *calcium-binding*  
 908 *proteins*, ACCBP: *amorphous calcium carbonate-binding proteins*, SMP: *shell matrix*  
 909 *proteins*.

| Physiological function |                                    | Model     |         |                 |                |                | Cluster                                                         | Gene Name                                                |
|------------------------|------------------------------------|-----------|---------|-----------------|----------------|----------------|-----------------------------------------------------------------|----------------------------------------------------------|
|                        |                                    | Model     | TP      | Slope before TP | Slope after TP | R <sup>2</sup> |                                                                 |                                                          |
| Calcification          | Ion transport                      | piecewise | 6.6±0.1 | ↖               | n.s.           | 0.33           | 1                                                               | sodium-dependent phosphate transport protein 2B          |
|                        |                                    |           | 6.6±0.0 | ↖               | n.s.           | 0.37           | 1                                                               | monocarboxylate transporter 5                            |
|                        | CBP                                |           | 6.6±0.0 | ↖               | n.s.           | 0.20           | 1                                                               | fibrillin-2-like                                         |
|                        |                                    |           | 6.6±0.0 | ↙               | n.s.           | 0.48           | 3                                                               | EF-hand Ca-binding domain-containing protein 6           |
|                        | Ca <sup>2+</sup> signaling pathway |           | 6.7±0.2 | n.s.            | ↖              | 0.20           | 2                                                               | neurocalcin-delta                                        |
|                        |                                    |           | 6.7±0.1 | ↙               | n.s.           | 0.32           | 3                                                               | ankyrin repeat and EF-hand domain-containing protein 1   |
|                        | Ca <sup>2+</sup> signaling pathway |           | 6.8±0.1 | ↙               | n.s.           | 0.40           | 3                                                               | polycystin-2                                             |
|                        |                                    |           | 6.9±0.3 | n.s.            | ↖              | 0.09           | 1                                                               | neurocalcin-like protein                                 |
|                        | Ion transport                      |           | 6.9±0.1 | ↖               | n.s.           | 0.71           | 1                                                               | monocarboxylate transporter 12-like                      |
|                        |                                    |           | 6.9±0.1 | ↙               | n.s.           | 0.17           | 3                                                               | D-galactoside-specific lectin                            |
|                        | CBP                                |           | 6.9±0.1 | ↙               | n.s.           | 0.31           | 3                                                               | sarcoplasmic calcium-binding protein                     |
|                        |                                    |           | 6.9±0.1 | ↙               | n.s.           | 0.42           | 3                                                               | calmodulin-like protein 12                               |
|                        | Ion transport                      |           | 6.9±0.1 | ↙               | ↙              | 0.45           | 3                                                               | sodium/calcium exchanger 3                               |
|                        |                                    |           | 6.9±0.1 | ↙               | n.s.           | 0.49           | 3                                                               | neuronal acetylcholine receptor subunit alpha-6          |
|                        | ACCBP                              |           | 6.9±0.1 | ↙               | n.s.           | 0.36           | 3                                                               | acetylcholine receptor subunit beta                      |
|                        |                                    |           | 6.9±0.1 | ↙               | n.s.           | 0.31           | 3                                                               | neuronal acetylcholine receptor subunit alpha-3          |
|                        | Ca <sup>2+</sup> signaling pathway |           | 7.0±0.2 | ↖               | n.s.           | 0.17           | 1                                                               | metabotropic glutamate receptor 5                        |
|                        |                                    |           | 7.0±0.2 | ↖               | n.s.           | 0.30           | 1                                                               | toll-like receptor 4                                     |
|                        | Signaling pathway                  |           | 7.0±0.2 | n.s.            | ↖              | 0.19           | 1                                                               | G protein-activated inward rectifier potassium channel 2 |
|                        |                                    |           | 7.0±0.4 | n.s.            | ↖              | 0.15           | 1                                                               | monocarboxylate transporter 9                            |
| Ion transport          |                                    | 7.0±0.1   | ↙       | n.s.            | 0.29           | 3              | organic cation transporter protein                              |                                                          |
|                        |                                    | 7.0±0.1   | ↙       | n.s.            | 0.32           | 3              | small conductance calcium-activated potassium channel protein 2 |                                                          |
|                        |                                    | 7.0±0.1   | ↙       | n.s.            | 0.24           | 3              | sodium/glucose cotransporter 4                                  |                                                          |

|                                                |                                          |           |         |   |      |      |   |                                                                               |
|------------------------------------------------|------------------------------------------|-----------|---------|---|------|------|---|-------------------------------------------------------------------------------|
|                                                | <i>Ca<sup>2+</sup> signaling pathway</i> |           | 7.0±0.1 | ↙ | n.s. | 0.65 | 3 | protocadherin FAT 4                                                           |
|                                                | <i>ACCBP</i>                             |           | 7.0±0.1 | ↙ | n.s. | 0.43 | 3 | acetylcholine receptor subunit beta-type unc-29                               |
|                                                | <i>CBP</i>                               |           | 7.1±0.3 | ↖ | n.s. | 0.28 | 1 | neurogenic locus notch homolog protein 1                                      |
|                                                | <i>Ca<sup>2+</sup> signaling pathway</i> |           | 7.1±0.2 | ↖ | n.s. | 0.26 | 1 | protocadherin gamma-A4                                                        |
|                                                | <i>CBP</i>                               |           | 7.1±0.1 | ↙ | ↙    | 0.42 | 3 | delta-like protein 4 / delta-like protein C                                   |
|                                                | <i>Ion transport</i>                     |           | 7.1±0.1 | ↙ | n.s. | 0.28 | 3 | calcium-activated potassium channel slowpoke                                  |
|                                                | <i>Ca<sup>2+</sup> signaling pathway</i> |           | 7.2±0.1 | ↖ | n.s. | 0.18 | 1 | protocadherin-11 X-linked                                                     |
|                                                |                                          |           | 7.2±0.2 | ↙ | n.s. | 0.14 | 3 | cadherin-87A                                                                  |
|                                                | <i>Ion transport</i>                     |           | 7.3±0.2 | ↖ | n.s. | 0.20 | 1 | monocarboxylate transporter 12-like                                           |
|                                                | <i>CBP</i>                               |           | 7.4±0.1 | ↖ | n.s. | 0.29 | 1 | calmodulin-A                                                                  |
|                                                | <i>Ca<sup>2+</sup> signaling pathway</i> |           | 7.5±0.1 | ↖ | n.s. | 0.21 | 1 | protocadherin gamma-B1                                                        |
|                                                | <i>Ion transport</i>                     |           | 7.6±0.1 | ↖ | ↖    | 0.33 | 1 | potassium channel GORK                                                        |
|                                                |                                          | loglinear | n.a.    | ↖ | n.a. | 0.42 | 1 | monocarboxylate transporter 9-like                                            |
|                                                | <i>CBP</i>                               |           | n.a.    | ↙ | n.a. | 0.25 | 3 | fibrillin-1                                                                   |
| <b>Shell organic matrix &amp; periostracum</b> | <i>SMP</i>                               | piecewise | 6.6±0.0 | ↖ | ↖    | 0.66 | 1 | asparagine-rich protein                                                       |
|                                                |                                          |           | 7.0±0.1 | ↖ | n.s. | 0.21 | 1 | perlucin-like protein                                                         |
|                                                | <i>SMP, periostracum formation</i>       |           | 7.0±0.1 | ↙ | n.s. | 0.37 | 3 | putative tyrosinase-like protein tyr-1                                        |
|                                                |                                          |           | 7.1±0.2 | ↖ | n.s. | 0.20 | 1 | tyrosinase-like protein 2                                                     |
|                                                |                                          |           | 7.4±0.2 | ↖ | n.s. | 0.24 | 1 | tyrosinase-like protein 2                                                     |
|                                                |                                          |           | 7.4±0.2 | ↖ | n.s. | 0.30 | 1 | tyrosinase-like protein 2                                                     |
|                                                | <i>SMP, carbonic anhydrase</i>           |           | 7.5±0.2 | ↖ | n.s. | 0.19 | 1 | nacrein-like protein F2                                                       |
|                                                |                                          |           | 7.5±0.2 | ↖ | n.s. | 0.25 | 1 | nacrein-like protein / carbonic anhydrase 6                                   |
|                                                | <i>SMP</i>                               | loglinear | n.a.    | ↙ | n.a. | 0.23 | 3 | leucine-rich repeat and fibronectin type-III domain-containing protein 5-like |
|                                                | <i>SMP, periostracum formation</i>       |           | n.a.    | ↖ | n.a. | 0.43 | 1 | tyrosinase-like protein 1                                                     |
|                                                | <i>SMP</i>                               |           | n.a.    | ↖ | n.a. | 0.28 | 1 | circumsporozoite protein-like                                                 |
